# Supplementary material
Source: Research Square preprint supplement (doi:10.21203/rs.3.rs-9788515/v1)
Supplement: Supplementary file 1 [file 65e37c90489432530e47331c.docx]

Climate adaptation pathways for agri-food systems: a conceptual framework for scalable application

Supplementary Information

Roberto O. Valdivia, Valeria Di Fant, Simona Pedde, Edmond Totin

# Supplementary Figure 1. National agricultural pathways under SSP4 (Inequality): Benin.

To further test the relevance of SSPs to the available solution space, we compare the pathways map for Benin in SSP5 to one in SSP4. Under SSP4, we imagine that only the most cost-effective low-regret measures would be plausible for Benin, such as seasonal forecast, early warning systems and traditional forms of irrigation. In the medium-term, measures compatible with the Technological Intensification Strategy would exist globally (e.g. in the Netherlands), but would remain largely inaccessible in Benin due to capacity and inequality constraints. Climate adaptation in Benin would thus need to rely on crop diversification, soil health improvements and traditional knowledge. The combination of these measures would grant some resilience, but their limits will most probably be reached in the mid-term already. Relocation of agricultural zones (and reliance on export) or of people (through migration) would be valuable in principle for the long-term, but neither are plausible under an SSP4 scenario, given limited governance capacity and inequitable access to international trade. Overall, in an SSP scenario world adaptation pathways globally would be highly fragmented, with high-capacity actors (e.g. global agribusiness) advancing, while vulnerable groups remain exposed to growing climate impacts and associated agricultural production loss.

*
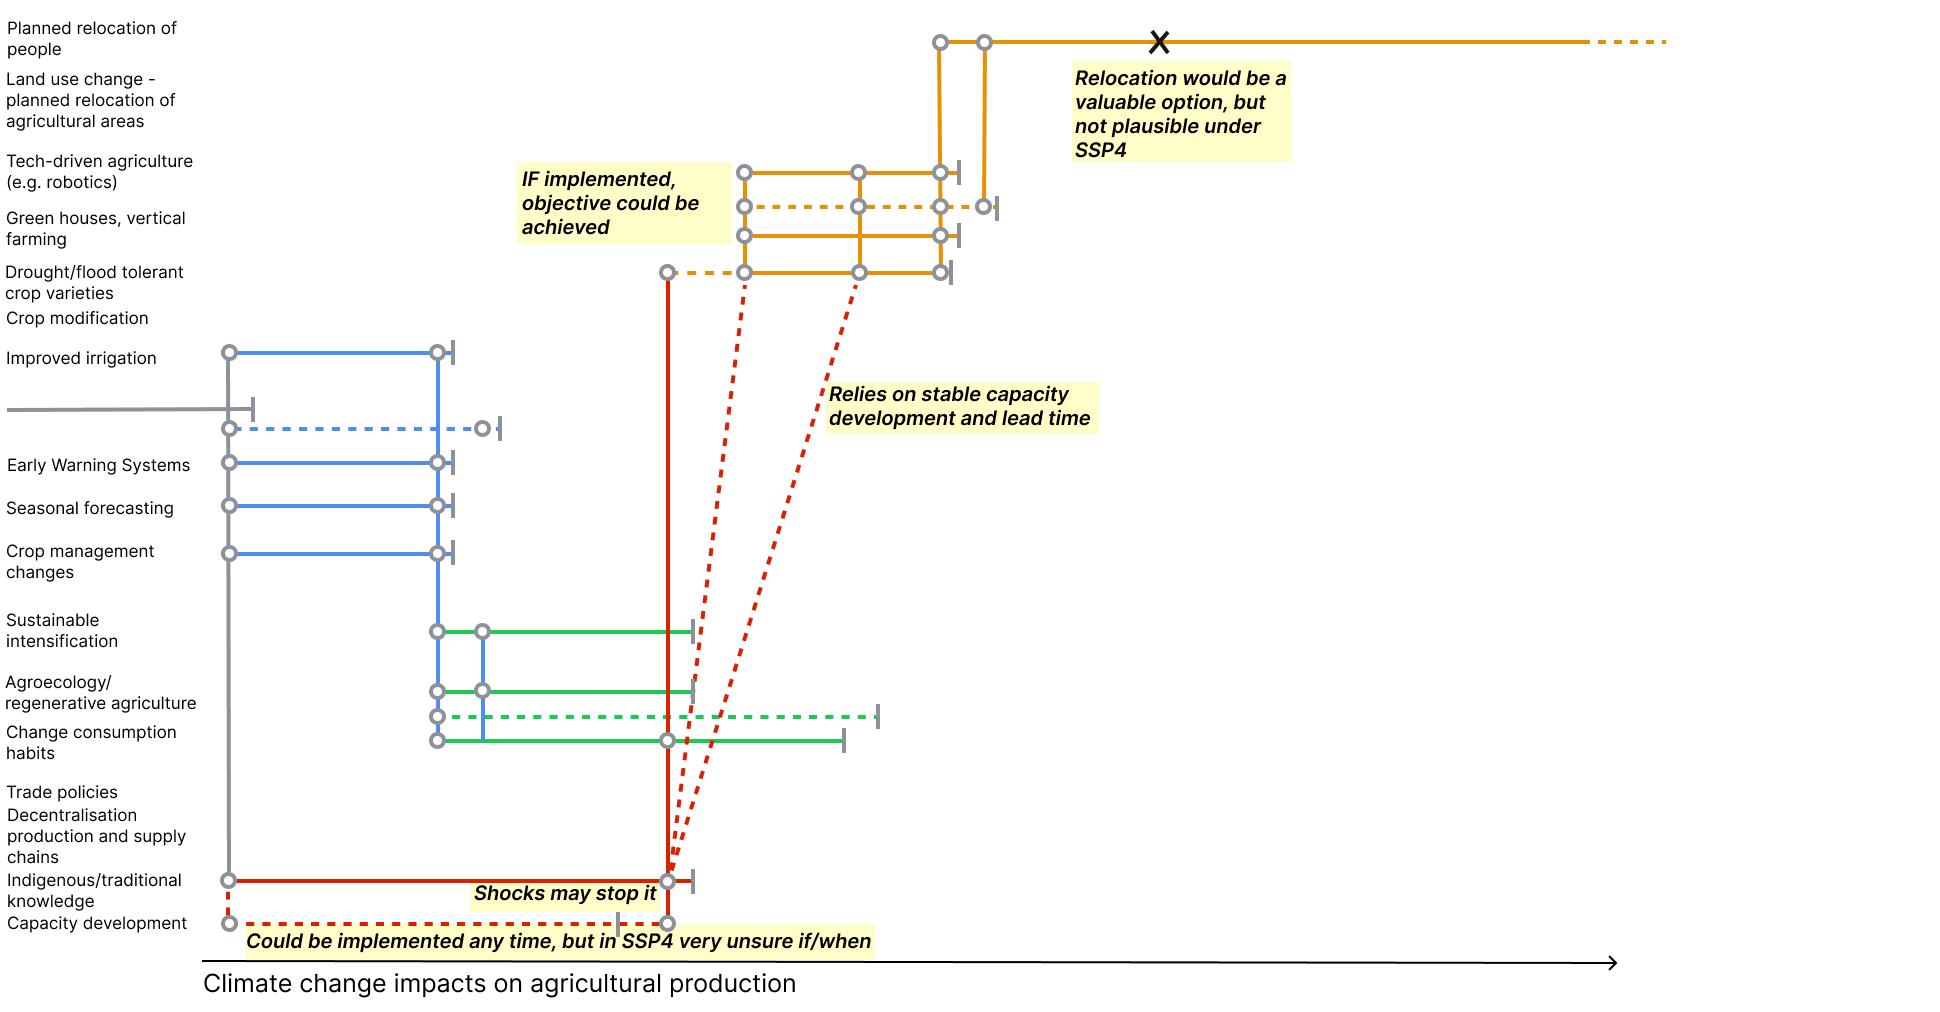
*

*Supplementary Figure 1: Pathways map of Benin under SSP4.*

# Supplementary Figure 2. Direction of transformation of measures in the adaptation pathways map (Global - SSP1).

This figure showcases the adaptation pathways map of Figure 1 in the main text


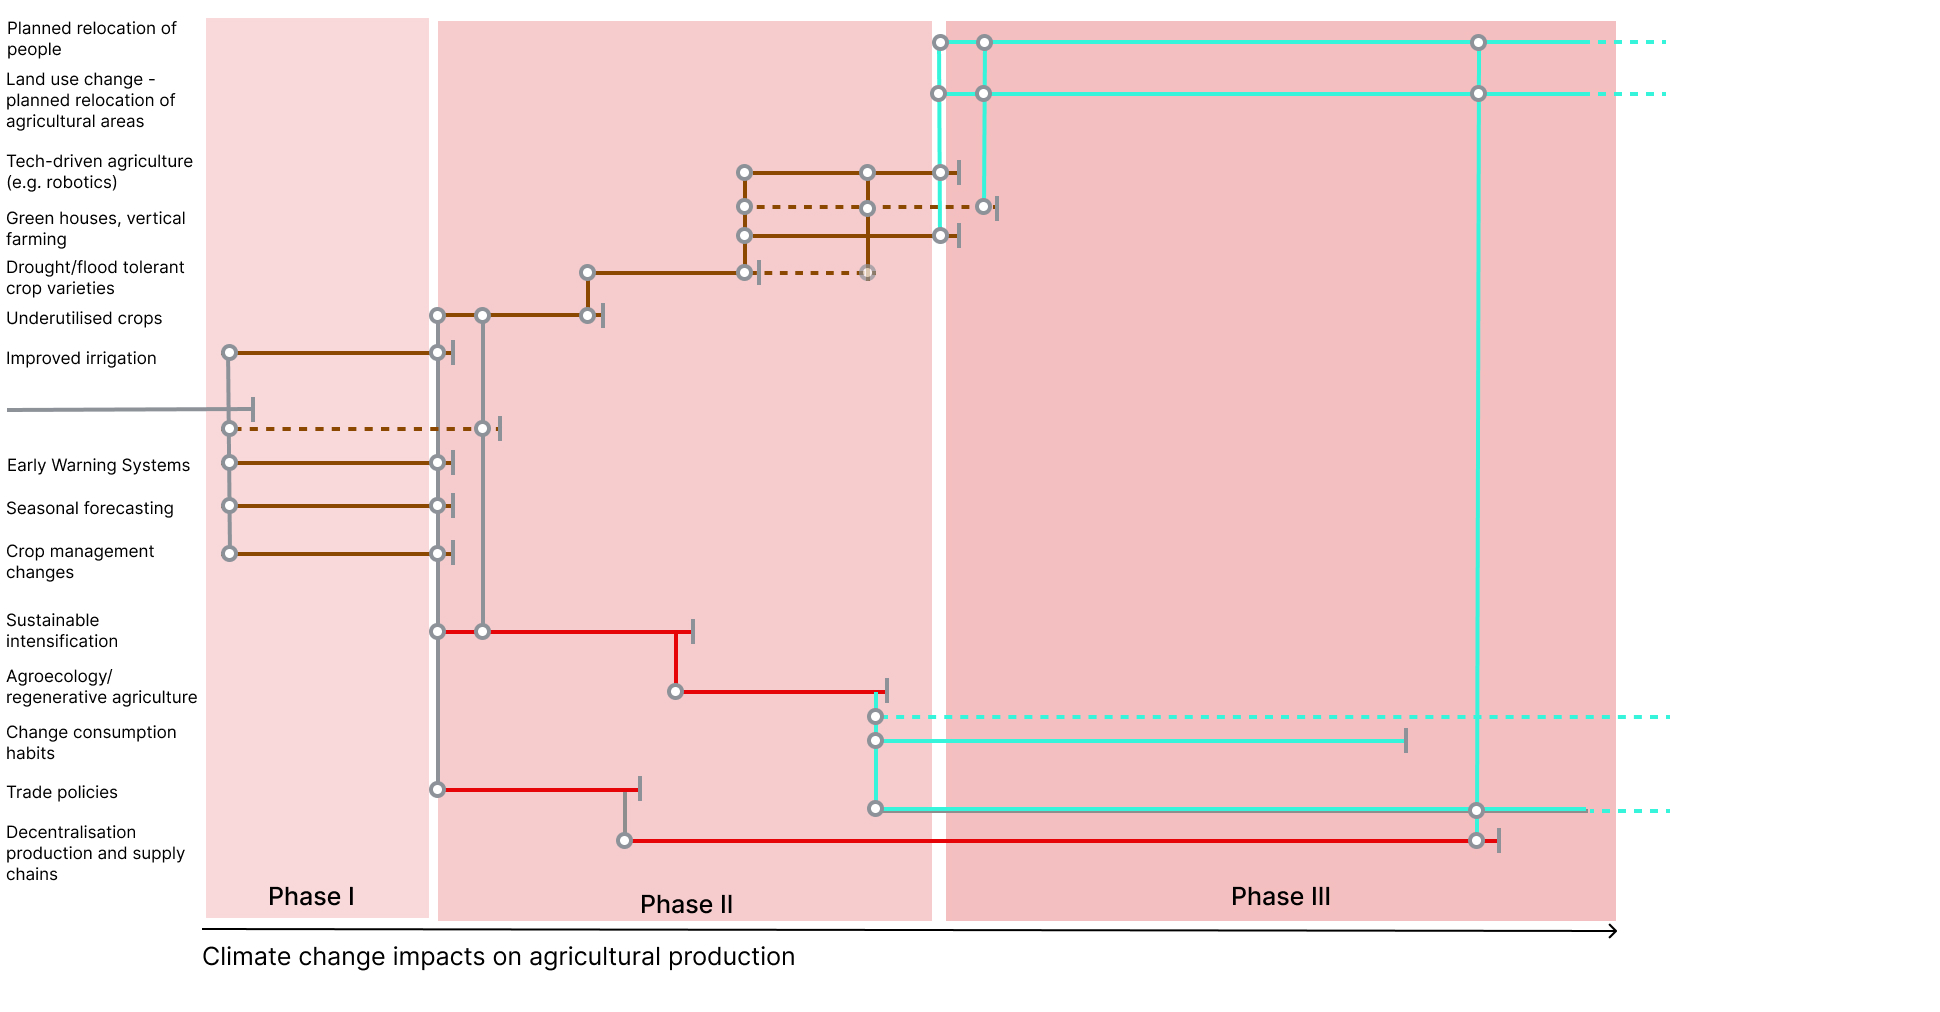


*Supplementary Figure 2: Adaptation pathways map for agri-food systems under growing climate change impacts, providing information on direction of transformation of included measures. Line colours indicate whether the direction of transformation implied for the implementation of each measure is hold (in brown), bend (red) or shift (light-blue).*

#

#

#

#

#

#

#

# Supplementary Table 1. Key concepts used in the Framework

This table summarizes the main concepts used in the framework and clarifies how terms such as SSPs/scenarios, worldviews, guiding principles, and adaptation pathways are used and related in this study. It is included to support consistent interpretation of the framework and its application to agri-food systems.

| **Term** | **What it is** | **Main purpose** | **Typical question it answers** | **Example in the context of the paper** |
| --- | --- | --- | --- | --- |
| SSPs (Scenarios) | Alternative socioeconomic futures | To describe plausible future development contexts | What kind of future world are we in? | SSP1, SSP3, SSP5 as different socioeconomic futures affecting governance, inequality, technology, trade, etc. |
| Worldviews | Broader societal logics, value systems, or interpretive lenses | To characterize how societies think about risk, governance, technology, equity, nature, etc. | What underlying logic or social outlook shapes responses? | Egalitarian, hierarchical, market-led, fatalistic types of societal orientation |
| Guiding / organizing principles | Dimensions used to structure and compare adaptation options | To organize the analysis in a consistent way | Along what dimensions do we compare strategies? | Technological vs nature-based; hold–bend–shift; incremental vs systemic vs transformational |
| Pathways | Sequences of actions or strategies over time under changing conditions | To show how adaptation unfolds over time, including shifts and thresholds | How do decisions and measures evolve over time? | Moving from early warning systems and crop management to irrigation, then to system redesign or relocation |

# Supplementary Table 2. Guiding principles considered for structuring adaptation pathways

This table summarizes the guiding principles discussed in Garschagen et al. (submitted) and considered in the development of adaptation pathways. The principles shown in **bold** are those applied in this study. Together, these principles capture different dimensions along which adaptation pathways can be compared and structured, including the depth and direction of transformation, the intensity of effort, agility and flexibility, equity, the balance between technological and nature-based approaches, and the primary risk component targeted.

| **Guiding principle** | **Description** | **Categories** |
| --- | --- | --- |
| **Depth of transformation** | Captures the extent of change pursued. In SSP1, deep early transformation is plausible; in SSP3, adaptation may be piecemeal and defensive. Direction can be framed using clear archetypes (e.g., advance, protect, retreat, accommodate) rather than abstract “depth” labels. | Incremental adjustments |
| Systemic shifts |
| Transformational restructuring |
| **Direction of transformation** | Captures the type of change pursued. Initially described in coastal adaptation as advance, protect, retreat, accommodate, here more broadly described. | New categories here |
| Intensity of effort | Reflects how much capital, institutional capacity, and political will is committed to adaptation. High-intensity pathways (full-in) deploy large investments rapidly; low-intensity pathways spread limited action over time. This is a key differentiator across SSPs, with SSP5 enabling rapid tech-driven intensification and SSP4 showing disparities in who can afford such intensity. | High intensity |
| Low intensity |
| Agility and flexibility | Indicates the ability to adjust strategies as conditions change. Agility is about speed of learning and iteration, while flexibility concerns whether measures are rigid and locked-in (e.g., large, fixed infrastructure) or modular and adjustable (e.g., adaptive governance, NbS). SSP1 and SSP2 worlds may prioritize adaptive management, while SSP3’s political fragmentation may limit agility. | High agility |
| Low agility |
| Equity | Equity can be embedded into the design of adaptation strategies (procedural and distributive justice from the outset) or treated as an explicit outcome goal. SSP4’s inequality narrative illustrates the risk of high adaptation performance for some but exclusion of others; SSP1 aligns equity with transformation from the start | Equity in process |
| Equity in outcome |
| **Technological - Nature-based balance** | Considers the degree of reliance on grey/technological infrastructure (e.g., robotics, vertical farming) versus nature-based solutions (e.g., agroecology, regenerative practices). The balance varies by SSP and affects co-benefits for mitigation, biodiversity, and resilience. |  |
| Risk component focus | Clearly define whether a pathway reduces hazard (e.g., climate-smart infrastructure), exposure (e.g., relocation, decentralization), or vulnerability (e.g., poverty reduction, livelihood diversification). This focus helps align adaptation with impact modelling needs. | Hazard |
| Exposure |
| Vulnerability |

# Supplementary Table 3. Extended list of adaptation measures considered for agri-food systems

This table lists the adaptation measures considered in the study, their plausible timing of implementation (**short-, medium-, or long-term**), the adaptation strategy or strategies with which they align (**Technological Adaptation, System Redesign, and Structural and Institutional Strategy**), and a short description of what each measure entails. Measures shown in italics were discussed during the expert workshop and included in the adaptation pathways presented in this paper.

| **Adaptation measure** | **Timing** | **Relevant adaptation strategies** | **Description** |
| --- | --- | --- | --- |
| *Drought/flood-tolerant crop varieties* | Medium | TA | Breeding and deploying crop varieties with enhanced drought tolerance. |
| Climate-resilient livestock breeds | Medium | TA | Developing and raising animal breeds adapted to heat and disease stress. |
| Conservation agriculture | Medium | SR | No-till, cover cropping, and crop rotations to improve soil health. |
| Agroforestry | Medium | SR | Integrating trees with crops or livestock for shade and soil conservation. |
| Integrated soil fertility management | Short | No-regret | Combining organic and inorganic amendments to optimize soil nutrients. |
| Integrated pest management | Short | No-regret | Leveraging biological, cultural, and chemical controls to reduce pests. |
| Crop-livestock integration | Medium | TA; SR | Coordinating crop and animal production for nutrient cycling benefits. |
| Livelihood diversification (off-farm activities) | Short | SR | Generating income through non-agricultural enterprises. |
| Index-based insurance | Short | TA; S&I | Payouts triggered by predefined climate indices to buffer losses. |
| *Early warning systems* | Short | No-regret | Real-time alerts for extreme weather events to inform preparedness. |
| *Seasonal forecasting* | Short | No-regret | Predicting seasonal climate trends to guide planting and resource use. |
| *Improved irrigation (drip, sprinkler)* | Medium | No-regret | Installing efficient water-delivery systems to reduce water stress. |
| Rainwater harvesting | Medium | TA; SR | Capturing and storing runoff for supplemental irrigation. |
| Climate information services | Short | TA | Delivering weather and climate advisories via digital platforms. |
| Extension services & capacity building | Short | SR; S&I | Training farmers on adaptive practices and new technologies. |
| Financial incentives (subsidies, carbon credits) | Short | S&I | Subsidies or credits to encourage adoption of adaptive investments. |
| *Crop management changes* | Short | No-regret | Adjusting planting dates, densities, and variety mixes for resilience. |
| *Increased use of underutilised (opportunity) crops* | Medium | TA | Promoting nutrient-rich minor crops to diversify diets and income. |
| *Regenerative agriculture* | Long | SR | Practices that rebuild soil organic matter and ecosystem function. |
| *Trade policies* | Medium | S&I | Adjusting tariffs and quotas to stabilize food supply and prices. |
| *Agroecology* | Long | SR | Applying ecological principles across the farming system. |
| *Greenhouses* | Medium | TA | Protected cultivation to manage temperature, humidity, and pests. |
| *Vertical farming* | Medium | TA | Stacked indoor systems to grow crops with minimal land footprint. |
| Floating farms | Long | TA | Hydroponic systems on waterways to expand cultivation area. |
| *Robotics & AI in Agriculture* | Long | TA | Automated machinery and AI tools for precision farming operations. |
| *Change in consumption habits* | Short | S&I | Shifting diets toward less resource-intensive foods. |
| *Decentralization of production & supply chains* | Medium | S&I | Localizing food systems to reduce transport risks and increase access. |
| *Planned relocation of people* | Long | S&I | Moving vulnerable populations away from high-risk agricultural zones. |
| *Land use change* | Long | S&I | Reassigning land to more climate-suitable agricultural uses. |
| *Relocation of agricultural areas* | Long | S&I | Shifting farming zones to match future climate suitability. |

#

# Supplementary Table 4. Guiding principles and adaptation measures.

# This table classifies the shortlisted adaptation measures along the **hold–bend–shift** continuum used in the paper to distinguish their depth and direction of transformation. **Hold** measures refer to incremental adjustments that aim to maintain existing production systems and reduce near-term vulnerability; **bend** measures involve more systemic changes that reconfigure practices, markets, or institutions while remaining broadly within existing system structures; and **shift** measures imply deeper transformations that alter the configuration of agri-food systems, including land use, supply chains, or patterns of consumption. The classification is illustrative and intended to support comparison of measures and pathways across different worldviews and contexts.

| **Adaptation measure** | **Adaptation transformation type** |
| --- | --- |
| Drought/flood-tolerant crop varieties | Bend |
| Early warning systems | Hold |
| Seasonal forecasting | Hold |
| Improved irrigation (drip, sprinkler) | Hold |
| Crop management changes | Hold |
| Increased use of underutilized (opportunity) crops | Bend |
| Regenerative agriculture | Bend |
| Trade policies | Bend |
| Agroecology | Bend |
| Greenhouses | Hold |
| Vertical farming | Hold |
| Robotics & AI in agriculture | Hold |
| Change in consumption habits | Shift |
| Decentralization of production & supply chains | Bend |
| Planned relocation of people | Shift |
| Land use change | Shift |
| Relocation of agricultural areas | Shift |

# Supplementary Table 5. Selected global and regional agri-food system initiatives and actors relevant to adaptation pathways

This table provides an overview of selected global and regional initiatives, programmes, and organizations relevant to agri-food systems transformation, climate adaptation, food security, and related policy, research, finance, and innovation agendas. It includes information on the lead organization(s), regional or geographic scope, type of initiative, and website. The table is illustrative rather than exhaustive and is intended to situate the proposed framework within the broader landscape of actors and initiatives shaping agri-food adaptation and transformation across scales.

| **Initiative / Program** | **Lead Organization(s)** | **Region / Scope** | **Type** | **Website** |
| --- | --- | --- | --- | --- |
| Sustainable Development Goals (SDGs – SDG2, 1, 13, 15 ) | United Nations | Global | Policy framework | <https://sdgs.un.org> |
| UN Food Systems Coordination Hub | United Nations (FAO-led) | Global | Policy / coordination | <https://www.unfoodsystemshub.org> |
| CGIAR (One CGIAR Initiatives) | CGIAR system | Global | Research / international organization | <https://www.cgiar.org> |
| FAO Strategic Framework | FAO | Global | Multilateral / policy | <https://www.fao.org> |
| World Bank Agriculture & Food | World Bank | Global | Finance / development | <https://www.worldbank.org/en/topic/agriculture> |
| IFAD Programs | IFAD | Global | Finance / development | <https://www.ifad.org> |
| Food and Land Use Coalition (FOLU) | Multi-stakeholder | Global | Policy / systems | <https://www.foodandlandusecoalition.org> |
| Climate-Smart Agriculture (CSA) | FAO, World Bank | Global | Policy / implementation | <https://www.fao.org/climate-smart-agriculture> |
| Global Methane Pledge | Governments | Global | Climate policy | <https://www.globalmethanepledge.org> |
| GODAN | GODAN Secretariat | Global | Data / platform | <https://www.godan.info> |
| 50x2030 Initiative | FAO, World Bank, IFAD | Global | Data / capacity | <https://www.50x2030.org> |
| Gates Foundation | Bill & Melinda Gates Foundation | Global | Philanthropy | <https://www.gatesfoundation.org> |
| Bezos Earth Fund | Bezos Earth Fund | Global | Philanthropy | <https://www.bezosearthfund.org> |
| Rockefeller Foundation | Rockefeller Foundation | Global | Philanthropy | <https://www.rockefellerfoundation.org> |
| McKnight Foundation (CRFS) | McKnight Foundation | Africa / Andes/US | Philanthropy / research | <https://www.mcknight.org> |
| W.K. Kellogg Foundation | Kellogg Foundation | Global / Americas | Philanthropy | <https://www.wkkf.org> |
| FFAR | Foundation for Food & Agriculture Research | U.S. / Global | Philanthropy / research | <https://foundationfar.org> |
| The Nature Conservancy | TNC | Global | NGO / conservation | <https://www.nature.org> |
| Conservation International | Conservation International | Global | NGO | <https://www.conservation.org> |
| Action Against Hunger | ACF | Global | NGO | <https://www.actionagainsthunger.org> |
| Partners of the Americas | Partners Network | Americas / Africa | NGO / partnerships | <https://www.partners.net> |
| RedEAmérica | RedEAmérica | Latin America | Philanthropy network | <https://www.redeamerica.org> |
| AGRA | AGRA + donors | Africa | Development / philanthropy | <https://agra.org> |
| CAADP | African Union / NEPAD | Africa | Policy | <https://www.nepad.org/caadp> |
| Africa Food Systems Forum | Multi-stakeholder | Africa | Policy platform | <https://agrf.org> |
| Feed Africa Strategy | African Development Bank (AfDB) | Africa | Finance / development | <https://www.afdb.org> |
| ILRI Nutrition, health and food security | ILRI (CGIAR) | Africa | Research / Livestock | <https://www.ilri.org> |
| Vision for Adapted Crops and Soils (VACS) | Multiple Organizations | Africa/Global | Research | <https://vacs.theplotline.org/#/?crop=africaneggplant&metric=yieldratio&model=future_ssp126> |
| ADB Agriculture Programs | Asian Development Bank | Asia | Finance / development | <https://www.adb.org> |
| Grow Asia | WEF + ASEAN partners | Asia | Public-private platform | <https://www.growasia.org> |
| ASEAN Food Security Initiatives | ASEAN | Asia | Policy | <https://asean.org> |
| ASEAN-CGIAR Food Security | ASEAN + CGIAR (IRRI) | Asia | Research / policy | <https://www.irri.org/node/2132> |
| IRRI Programs | IRRI | Asia / Global | Research | <https://www.irri.org> |
| TAFSSA, Transforming Agri-Food Systems in South Asia | ARU-One CGIAR - Others | South Asia | Research / policy | <https://www.aru.ac.uk/research/why-research-at-aru/sustainable-futures/transforming-agri-food-systems-in-south-asia-tafssa> |
| SIGMA, Southeast Asia Innovation Alliance for a Global Model of Future Agri-food System | Multi-partner US-Singapore | Asia | Research | <https://asc.illinois.edu/sigma/> |
| ASSET, Agroecology and Safe Food System Transitions | Multi-partner, GRET, CIRAD | Asia | Policy / research | <https://www.asset-project.org/> |
| IICA Programs | IICA – Multi-country | Latin America | Regional development | <https://www.iica.int> |
| FONTAGRO | IDB + partners | Latin America | Research / innovation | <https://www.fontagro.org> |
| CELAC Food Security Plan | CELAC | Latin America | Policy | <https://www.cepal.org/en> |
| PLACA,Platform of Latin America and the Caribbean for Climate Action on Agriculture | Governments + partners | Latin America | Climate / policy | <https://accionclimaticaplaca.org/en/> |
| Inter-American Development Bank (IDB) IDB Strategy+ | IDB | Latin America | Finance | <https://www.iadb.org/en/who-we-are/institutional-strategy> |
| Common Agricultural Policy (CAP) | European Commission | EU | Policy / finance | <https://agriculture.ec.europa.eu/common-agricultural-policy_en> |
| Farm to Fork Strategy | European Commission | EU | Policy | <https://food.ec.europa.eu> |
| Food 2030 | European Commission | EU | Research / policy | <https://research-and-innovation.ec.europa.eu/research-area/environment/bioeconomy/food-systems/food-2030_en> |
| Horizon Europe (Cluster 6) | European Commission | EU | Research funding | <https://research-and-innovation.ec.europa.eu/funding/funding-opportunities/funding-programmes-and-open-calls/horizon-europe/cluster-6-food-bioeconomy-natural-resources-agriculture-and-environment_en> |
| FABLE Consortium | SDSN | Global / EU nodes | Research / foresight | <https://www.fableconsortium.org> |
| Foresight4Food | Oxford, Wageningen & partners | Global | Research / foresight | <https://foresight4food.net> |
| AgMIP | Global network | Global | Research / foresight/ modeling | <https://agmip.org> |
| Global Research Alliance on Agricultural GHGs | Governments + research | Global | Research | <https://globalresearchalliance.org> |
